# Supplementary material
Source: publisher site journal article supplement (https://www.dovepress.com/article/supplementary_file/581826/581826%20Revised%20Supplementary%20Table.docx)
Supplement: Supplementary file 1 [file 581826%20Revised%20Supplementary%20Table.docx]

Supplementary Table 1: Diagnostic, Medication, and Laboratory Value Codes for Inclusion and Exclusion Criteria

Description: This table lists the standardized diagnostic, medication, and laboratory value codes used to define inclusion and exclusion criteria for cohort identification within the TriNetX database.

| Diagnosis/Medication/Laboratory Value | Diagnostic Code Utilized |
| --- | --- |
| Diagnosis: Optic Neuritis | ICD-10CM: H46 |
| Diagnosis: Giant Cell Arteritis | ICD-9CM: 446.5 |
| Diagnosis: Type 1 Diabetes Mellitus | ICD-10CM: E10 |
| Diagnosis: Type 2 Diabetes Mellitus | ICD-10CM: E11 |
| Hyperlipidemia | ICD-10CM: E78.5 |
| Essential (Primary) Hypertension | ICD-10CM: I10 |
| Overweight and Obesity | ICD-10CM: E66 |
| Chronic Ischemic Heart Disease | ICD-10CM: I25 |
| Medication: Tadalafil | RxCUI: 358263 |
| Medication: Avanafil | RxCUI: 1291301 |
| Medication: Vardenafil | RxCUI: 306674 |
| Medication: Sildenafil | RxCUI: 136411 |
| Medication: Tadalafil | RxCUI: 358263 |
| Medication: Avanafil | RxCUI: 1291301 |
| Medication: Vardenafil | RxCUI: 306674 |
| Medication: Glucagon-like peptide-1 (GLP-1) analogues | ATC: A10BJ |
| Laboratory Value: Hemoglobin A1c total in Blood | TNX: 9037 |

Footnotes: ICD: International Classification of Diseases; RxCUI: RxNorm Concept Unique Identifier; ATC: Anatomical Therapeutic Chemical; TNX: TriNetX, the standardized TriNetX system for simplified searching of laboratory values.
